# Supplementary material for: Facile synthesis of highly stable heterogeneous catalysts by entrapping metal nanoparticles within mesoporous carbon
Source: Royal Society of Chemistry journal article supplement (doi:10.1039/c4ta00131a), 2014-01-01
Supplement: c4ta00131a1.pdf [file c4ta00131a1.pdf]

## Supporting information

### **Facile synthesis of highly stable heterogeneous catalysts by entrapping metal nanoparticles within mesoporous carbon**

Hui Mao,<sup>\*a,c</sup> Shengjie Peng,<sup>c</sup> Hong Yu,<sup>c</sup> Jing Chen,<sup>c</sup> Shilin Zhao<sup>a</sup> and Fengwei Huo<sup>\*b,c</sup>

<sup>a</sup> College of Chemistry and Materials Science, Sichuan Normal University, Chengdu, PR China, 610068.

<sup>b</sup> Institute of Advanced Materials, Nanjing University of Technology, Nanjing 211816, P.R. China.

<sup>c</sup> School of Materials Science and Engineering, Nanyang Technological University, 50 Nanyang Avenue, Singapore 639798.

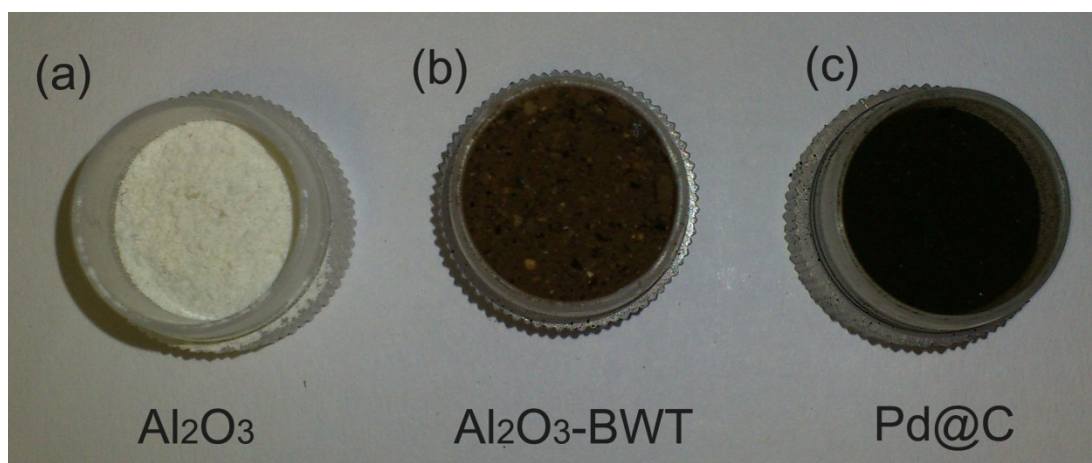

**ESI, S1†.** The photos of (a)  $\gamma$ - $\text{Al}_2\text{O}_3$ , (b)  $\text{Al}_2\text{O}_3$ -BWT and (c)  $\text{Pd}@C$ .

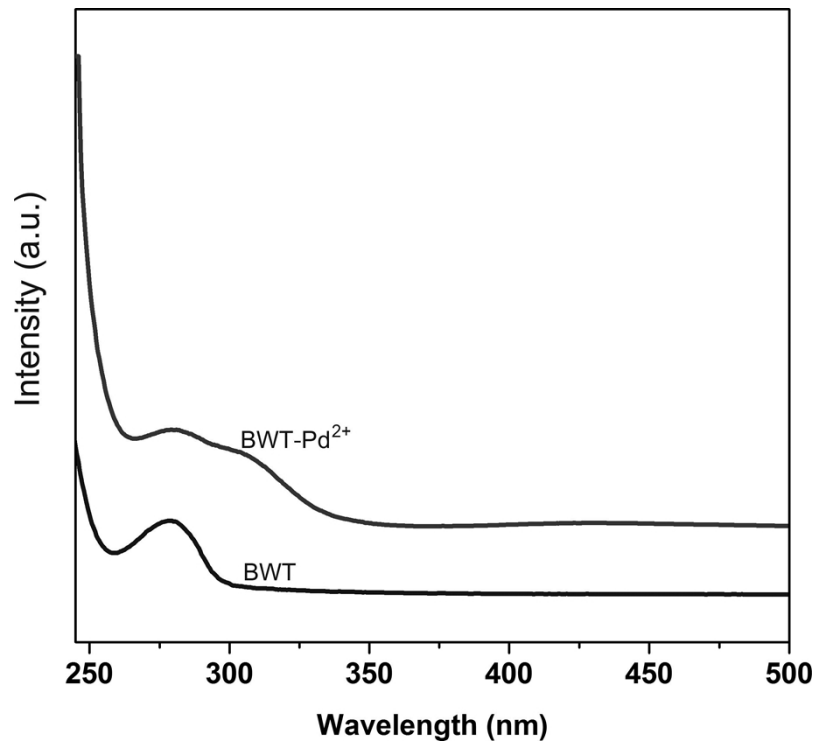

ESI, S2†. UV-vis spectra of BWT and BWT-Pd<sup>2+</sup>.

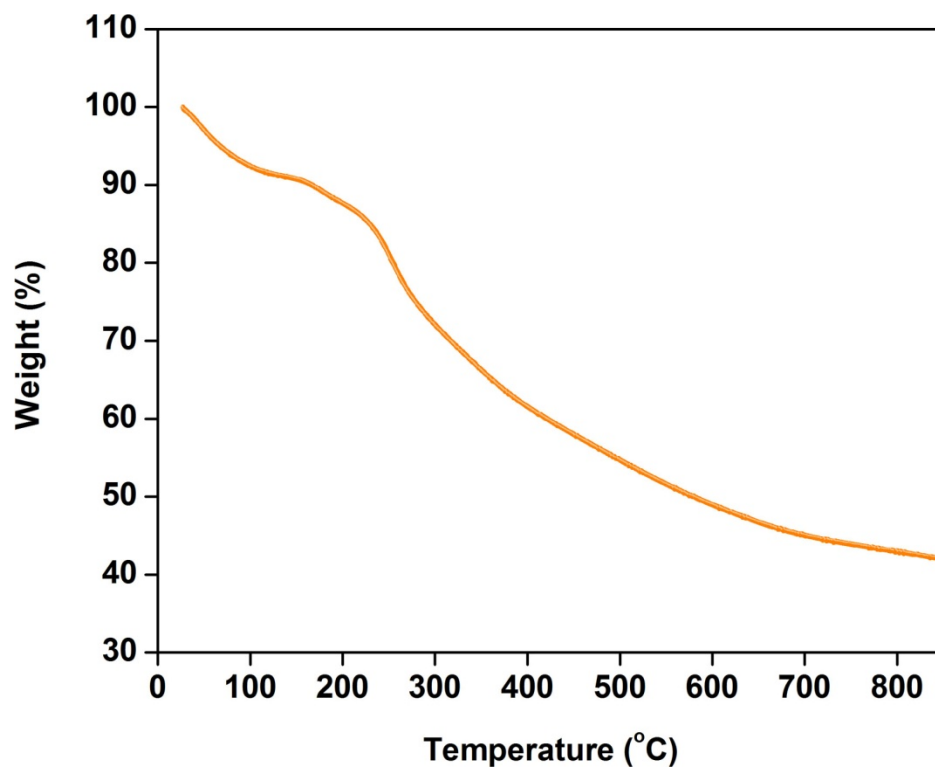

ESI, S3†. TGA of BWT in N<sub>2</sub> flow in the temperature range of 33 -850 °C.

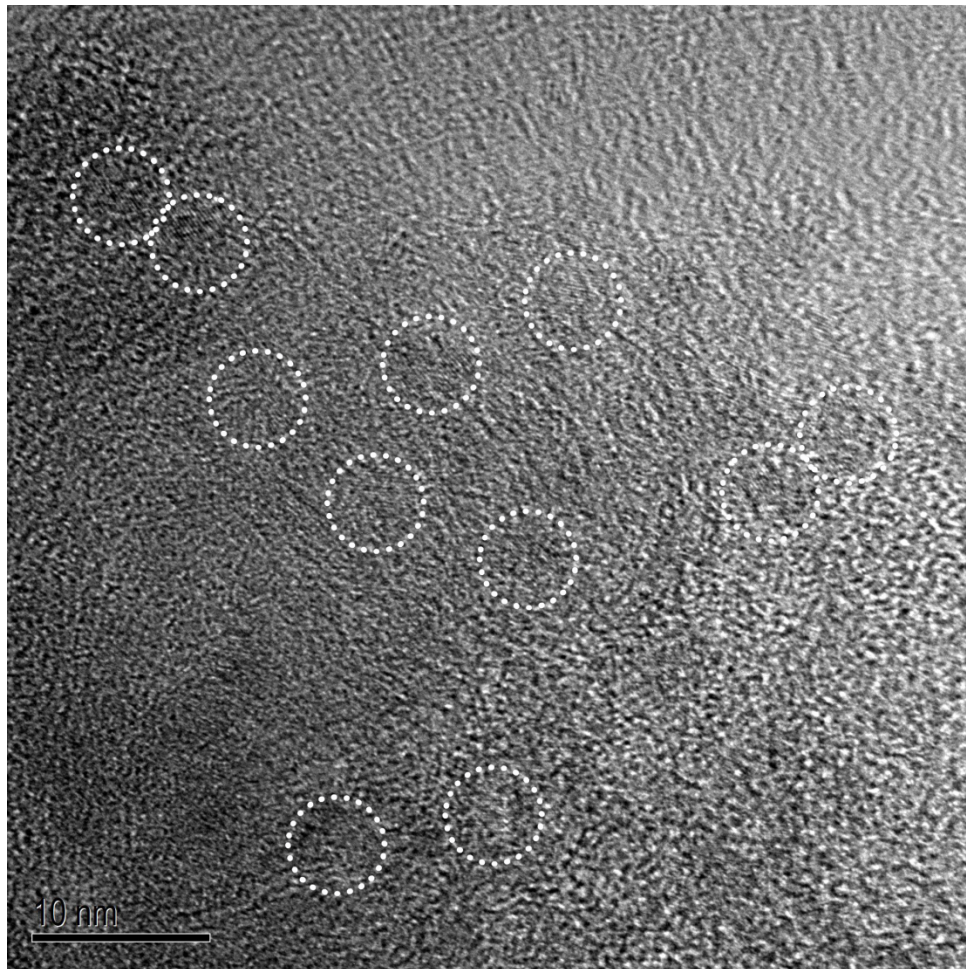

**ESI, S4†.** TEM image of Pd@C after recycled 10 times.

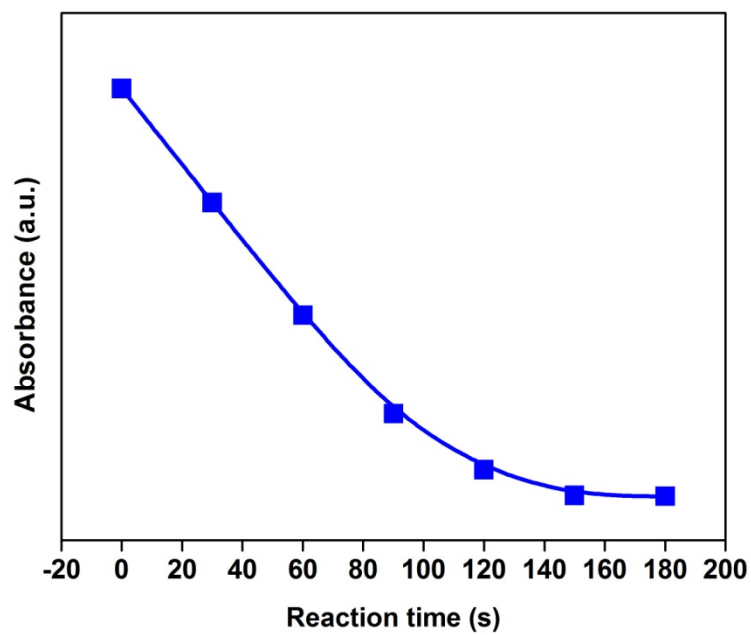

**ESI, S5†.** Absorbance of 4-NP at 400 nm vs. reaction time. Reaction conditions: 5 mL of 4-NP aqueous solution (0.13 mM), 5 mg of Pd@C catalyst and 13 mM NaBH<sub>4</sub>.

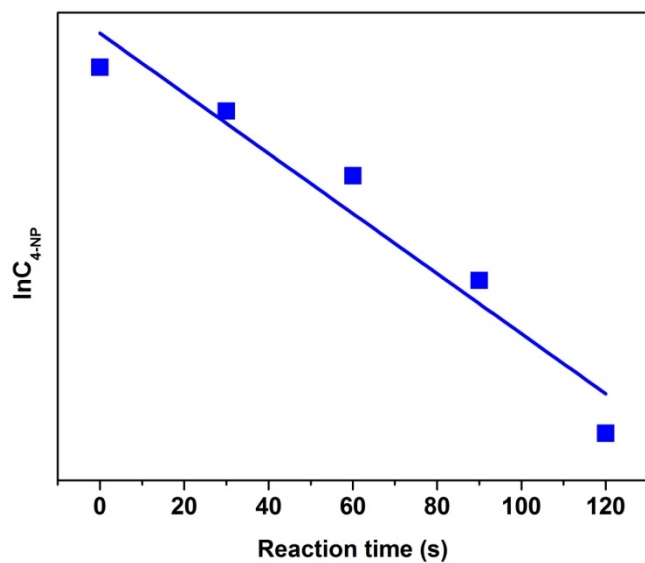

**ESI, S6†.** Plot of  $\ln C_{4\text{-NP}}$  versus time corresponding to the reduction of 4-NP catalyzed by the Pd@C. Reaction conditions: 5 mL of 4-NP aqueous solution (0.13 mM), 5 mg of Pd@C catalyst and 13 mM NaBH<sub>4</sub>.
